# Supplementary material for: Availability of living donor optimizes timing of liver transplant in high-risk waitlisted cirrhosis patients
Source: publisher site journal article supplement (doi:10.18632/aging.204982), 2023-09-02
Supplement: Supplementary file [file aging-v15i17-204982-supplementary-material-SD2.pdf]

SUPPLEMENTARY FIGURES

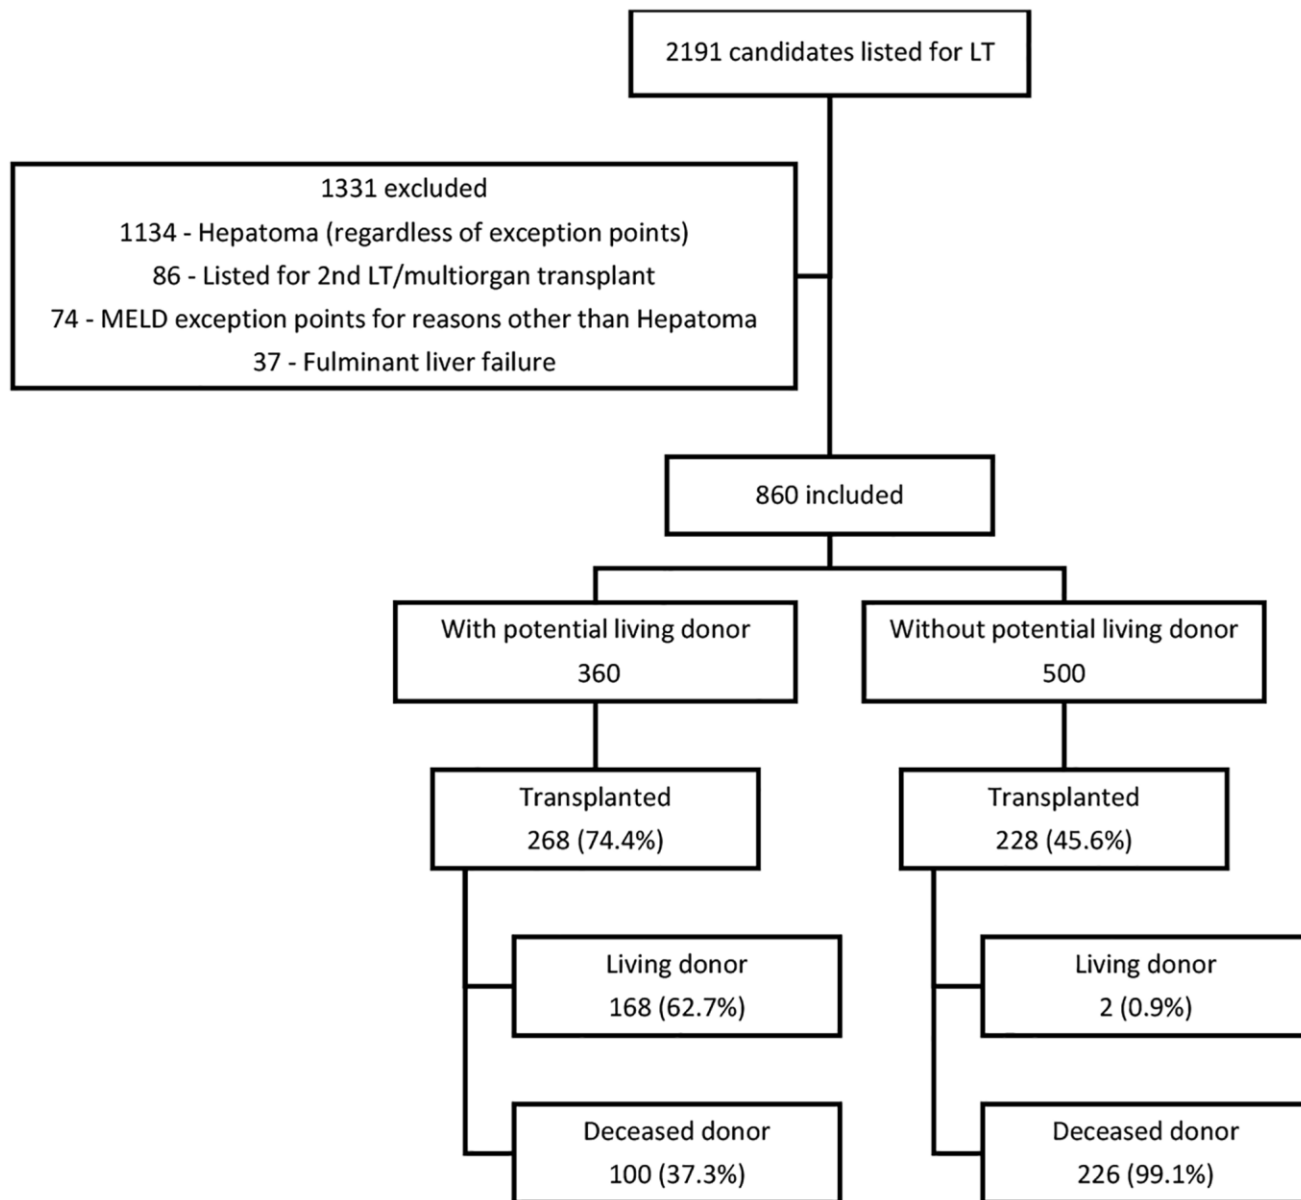

Supplementary Figure 1. Consort diagram showing study criteria and patient population.

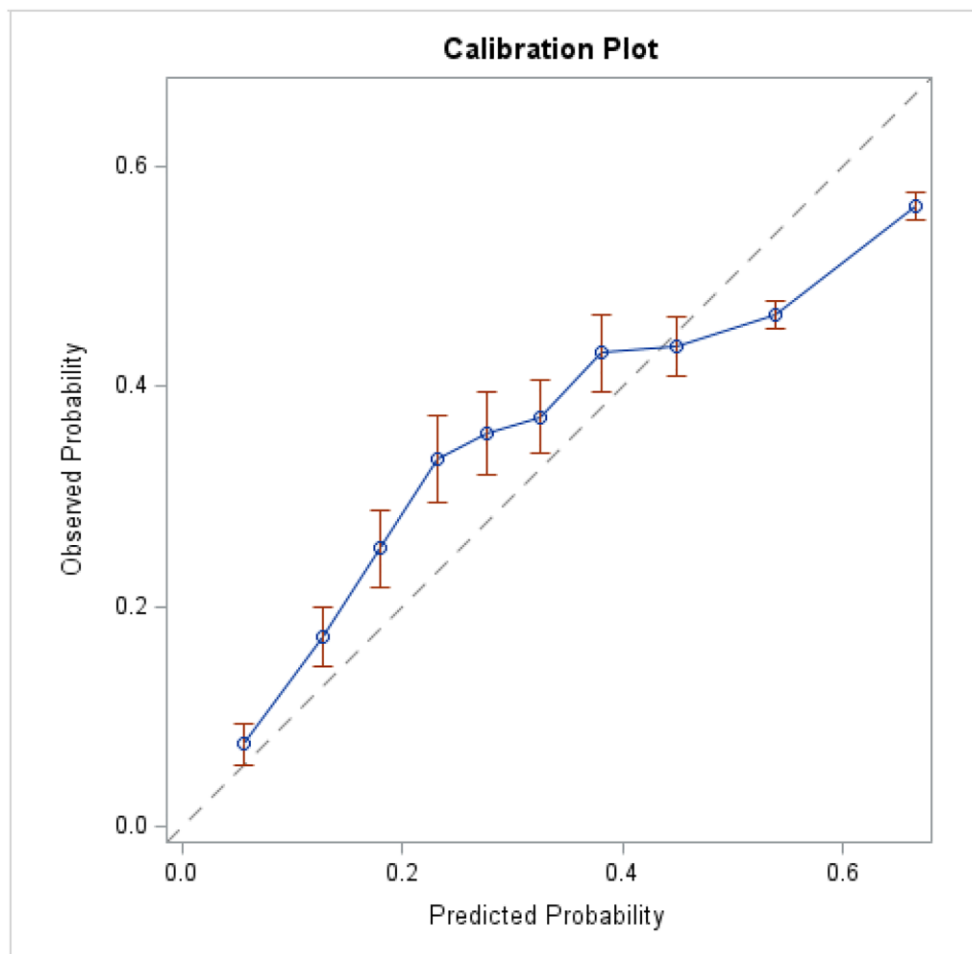

**Supplementary Figure 2. Calibration plot (X-axis: Predicted probability of transplant based on the model. Y-axis: Observed probability of transplant).**
